# Supplementary material for: Differential DNA Methylation Patterns in Primary and Recurrent Glioblastoma : A Protumorigenic Role for the TEM8 Gene
Source: Research Square preprint supplement (doi:10.21203/rs.3.rs-1407692/v1), 2022-03-03
Supplement: Supplementary file 1 [file 5cdb3a4a748e5e39b6203c3a.xlsx]

## Sheet: Sheet1
	Forward primer (5'-3')	Reverse primer (5'-3')	Amplicon (bp)	Tm (°C)
OCT4/POU5F1	ACATCAAAGCTCTGCAGAAAGAACT	CTGAATACCTTCCCAAATAGAACCC	127	60
TWIST1	GTCCGCAGTCTTACGAGGAG	CCAGCTTGAGGGTCTGAATC	159	60
β-catenin	CACAAGCAGAGTGCTGAAGGTGC	AAGGAGGCCTTCCATCCCTTC	190	60
AXIN2	CCGAGATCCAGTCGGTGATG	GGTTGGCGAAAGTTTGCACT	212	60
NANOG	CCTCCTCCATGGATCTGCTTATTCA	CAGGTCTTCACCTGTTTGTAG	262	60
ZEB1	TGCACTGAGTGTGGAAAAGC	TGGTGATGCTGAAAGAGACG	237	60
ANTXR1	AGGTTCGTTGGGGAGAAAAGG	CAGTAGGACCCACAAGGCAT	200	60
ASAP1	TGACTAGCAAAACGCAGAACC	ACACACATTATATCCCCCTCC	152	60
CNOT7	CTCAGCGACACAAGTACATAAATAA	TGGCATAGTGAGGGCACAAG	114	60
LRP6	CCGAGTCAGAACCTGGAAATAC	CTCCAACTGATCTCCCATCTAATC	127	60
GAPDH	TTAAAAGCAGCCCTGGTGAC	CTCTGCTCCTCCTGTTCGAC	144	60
RPL35A	GAACCAAAGGGAGCACACAG	CAATGGCCTTAGCAGGAAGA	236	50
WNT1	GGTTTCTGCTACGCTGCTG	TAAGCAGGTTCGTGGAGGAG	113	60
WNT2	GAAGCCAACGAAAAATGACC	CCCACAGCACATGACTTCAC	148	50
WNT4	GCGAGCAACTGGCTGTACC	GAGTCCCTTGCGTCACCAC	256	65
WNT11	ATATCCGGCCTGTGAAGGACTC	TCTTGTTGCACTGCCTGTCTTG	114	65
ACTA2/αSMA	CAGCCAAGCACTGTCAGG	CAATGGATGGGAAAACAGC	150	60
